# Supplementary material for: Characterization of Permeability Barrier Dysfunction in a Murine Model of Cutaneous Field Cancerization Following Chronic UV-B Irradiation: Implications for the Pathogenesis of Skin Cancer
Source: MDPI journal article supplement (doi:10.3390/cancers13163935), 2021-08-04
Supplement: s1 [file cancers-1327871-supplementary.pdf › cancers-1327871-supplementary.pdf]

# Supplementary Material: Characterization of Permeability Barrier Dysfunction in a Murine Model of Cutaneous Field Cancerization Following Chronic UV-B Irradiation: Implications for the Pathogenesis of Skin Cancer

Juan Luis Santiago, Jose Ramon Muñoz-Rodriguez, Miguel Angel de la Cruz-Morcillo, Clara Villar-Rodriguez, Lucia Gonzalez-Lopez, Carolina Aguado, Miriam Nuncia-Cantarero, Francisco Javier Redondo-Calvo, Jose Manuel Perez-Ortiz and Eva Maria Galan-Moya

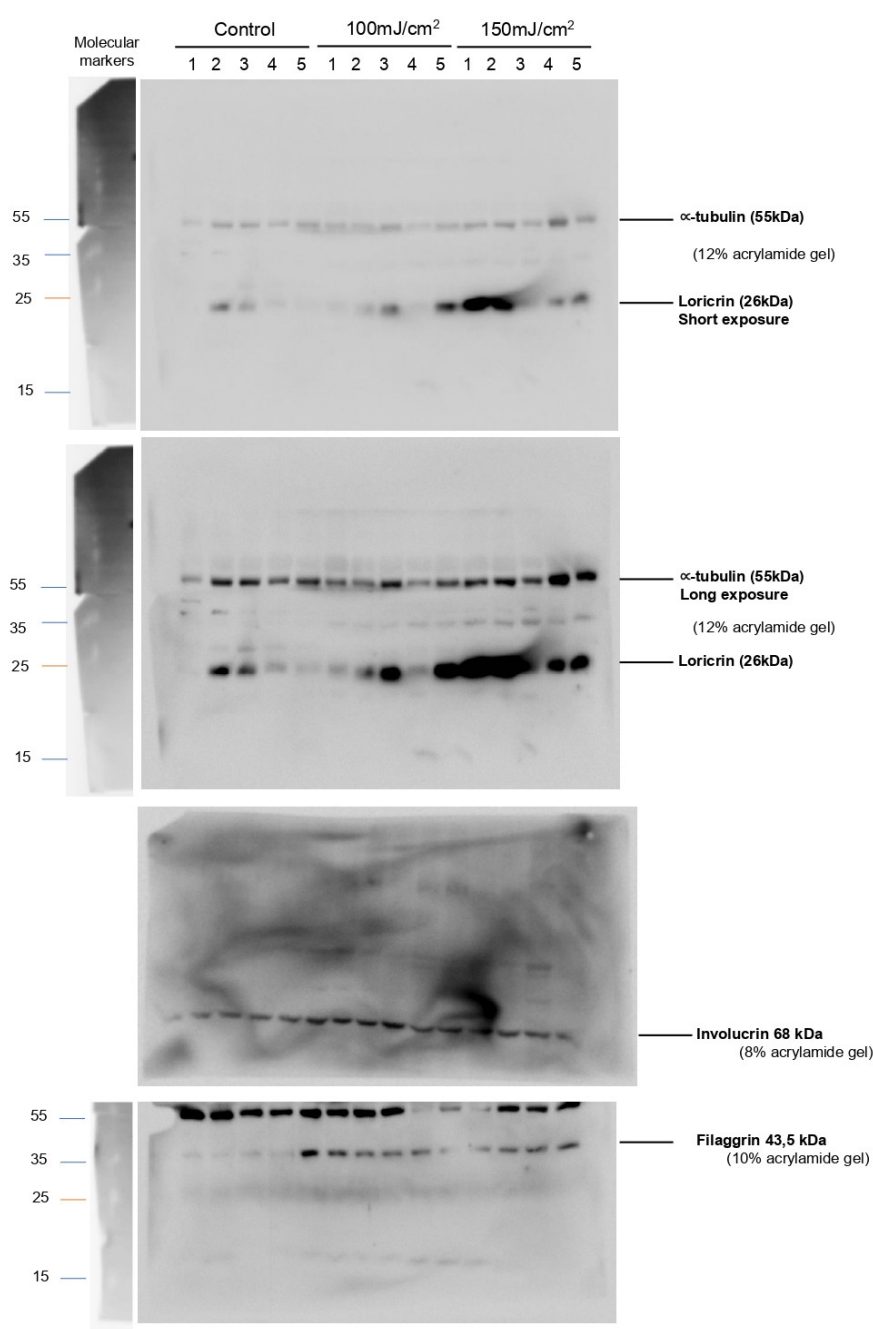

**Figure S1.** Uncropped original Western Blot.
